# Supplementary material for: Quercetin, a Plant Flavonol Attenuates Diabetic Complications, Renal Tissue Damage, Renal Oxidative Stress and Inflammation in Streptozotocin-Induced Diabetic Rats
Source: MDPI journal article supplement (doi:10.3390/metabo13010130), 2023-01-15
Supplement: s1 [file s1]

---

### Supplementary data

#### 1. Glucose and Insulin level

| Groups | Glucose (mg/dl) | Insulin (ng/ml) |
|--------|-----------------|-----------------|
| C      | 99±5.3          | 1.15±0.05       |
| NC     | 230±7.2         | 0.28±0.04       |
| PC     | 104±9.4         | 1.1±0.03        |
| QT     | 151±7.1         | 0.75±0.04       |

#### 2. Lipid profile

| Groups | Cholesterol (mg/dL) | Triglycerides (mg/dL) | HDL-Cholesterol (mg/dL) |
|--------|---------------------|-----------------------|-------------------------|
| C      | 97.34±5.7           | 122.9±8.5             | 66.7±8.7                |
| NC     | 146.37±8.7          | 230.7±7.3             | 45.6±7.2                |
| PC     | 96.45±6.4           | 124.3±9.1             | 64.6±9.2                |
| QT     | 123.23±4.6          | 193.23±9.3            | 52.9±9.4                |

#### 3. Kidney function profile

| Groups | Creatinine (μmol/L) | Urea (mg/dL) |
|--------|---------------------|--------------|
| C      | 72.9±4.5            | 19.6±1.3     |
| NC     | 102.7±7.8           | 39.9±1.8     |
| PC     | 74.39±5.3           | 30±2.3       |

|    |          |          |
|----|----------|----------|
| QT | 81.5±6.9 | 18.6±2.6 |
|----|----------|----------|

#### 4. Antioxidant enzyme level

| Groups | SOD (U/mg protein) | CAT (U/mg protein) | GSH ( $\mu$ mol/g protein) | GST (mU/mg protein) |
|--------|--------------------|--------------------|----------------------------|---------------------|
| C      | 68.5±6.3           | 28.5±3.5           | 30.6±3.1                   | 150.6±9.3           |
| NC     | 40.3±3.7           | 14.2±2.6           | 19.9±2.4                   | 81.9±10.4           |
| PC     | 66.2±6.2           | 26.8±3.7           | 28.5±4.1                   | 147.5±12.6          |
| QT     | 51.8±9.5           | 20.6±1.4           | 25.4±3.6                   | 125.4±9.7           |

#### 5. Lipid peroxidation status

| Groups | MDA (nmol/g) | NO ( $\mu$ mol/L) |
|--------|--------------|-------------------|
| C      | 109.7±6.2    | 16.3±1.2          |
| NC     | 149.3±3.2    | 32.4±2.4          |
| PC     | 112.4±6.7    | 15.8±1.4          |
| QT     | 123.3±4.2    | 22.3±1.9          |

## 6. Inflammatory markers

| Groups | TNF alpha (pg/ml) | IL-6 (pg/ml) | IL-1 beta (pg/ml) |
|--------|-------------------|--------------|-------------------|
| C      | 36.49±3.2         | 60.49±6.2    | 18.80±1.9         |
| NC     | 52.64±2.1         | 95.64±3.7    | 23.30±1.2         |
| PC     | 35.68±3.6         | 58.68±6.1    | 19.40±1.8         |
| QT     | 42.29±1.3         | 70.29±9.5    | 21.10±1.4         |
